# Supplementary material for: Treatment-Related Serious Adverse Events of Immune Checkpoint Inhibitors in Clinical Trials: A Systematic Review
Source: PubMed Central journal article supplement (PMC8144509; doi:10.3389/fonc.2021.621639), 2021-05-11
Supplement: DataSheet_1.pdf [file DataSheet_1.pdf]

**Additional Table S1.** Characteristics of included trials.

|    | <b>Author, year</b> | <b>Phase</b> | <b>Cancer type</b>                               | <b>Stage</b>   | <b>Intervention</b>          | <b>NO. of patients</b> | <b>Fatal adverse events</b> |
|----|---------------------|--------------|--------------------------------------------------|----------------|------------------------------|------------------------|-----------------------------|
| 1  | Hiroyuki, 2020      | III          | urothelial cancer                                | metastatic     | pembrolizumab                | 30                     | 0                           |
| 2  | Shin, 2020          | II           | ovarian cancer                                   | metastatic     | pembrolizumab                | 21                     | 0                           |
| 3  | Neal, 2019          | I/ II        | lung cancer                                      | metastatic     | nivolumab                    | 109                    | 1                           |
| 4  | Lillian, 2019       | II           | head and neck squamous cell carcinoma            | metastatic     | durvalumab                   | 65                     | 0                           |
|    |                     |              |                                                  |                | tremelimumab                 | 65                     | 0                           |
|    |                     |              |                                                  |                | durvalumab+ tremelimumab     | 133                    | 1                           |
| 5  | Yung, 2019          | II           | gastric/gastroesophageal junction adenocarcinoma | metastatic     | pembrolizumab                | 31                     | 0                           |
|    |                     |              |                                                  |                | pembrolizumab + chemotherapy | 25                     | 0                           |
| 6  | Leisha, 2019        | I            | triple-negative breast cancer                    | metastatic     | atezolizumab                 | 116                    | 0                           |
| 7  | Ken, 2019           | III          | gastric/gastroesophageal junction adenocarcinoma | metastatic     | nivolumab                    | 152                    | 0                           |
| 8  | Adams, 2019         | II           | triple-negative breast cancer                    | metastatic     | pembrolizumab                | 170                    | 0                           |
| 9  | Paolo, 2019         | III          | melanoma                                         | metastatic     | nivolumab                    | 206                    | 0                           |
| 10 | Yutaka, 2019        | I            | gastric/gastroesophageal junction adenocarcinoma | metastatic     | durvalumab                   | 22                     | 0                           |
| 11 | Manish, 2019        | II           | esophageal cancer                                | metastatic     | pembrolizumab                | 121                    | 1                           |
| 12 | Stephen, 2019       | II           | B-cell lymphoma                                  | non-metastatic | nivolumab                    | 121                    | 0                           |
| 13 | Makoto, 2019        | I            | lung cancer                                      | metastatic     | pembrolizumab                | 38                     | 1                           |
| 14 | Robert, 2019        | II           | hodgkin lymphoma                                 | non-metastatic | pembrolizumab                | 210                    | 0                           |
| 15 | Janice, 2019        | I            | thyroid cancer                                   | metastatic     | pembrolizumab                | 22                     | 0                           |
| 16 | Adams, 2019         | II           | triple-negative breast cancer                    | metastatic     | pembrolizumab                | 84                     | 0                           |
| 17 | Kenji, 2019         | II           | uterine cervical cancer                          | metastatic     | nivolumab                    | 64                     | 0                           |
| 18 | Paul, 2019          | II           | merkel cell carcinoma                            | metastatic     | pembrolizumab                | 50                     | 1                           |

|    |                   |       |                                                     |                |                                        |     |   |
|----|-------------------|-------|-----------------------------------------------------|----------------|----------------------------------------|-----|---|
| 19 | Ahmad,<br>2019    | II    | melanoma                                            | metastatic     | ipilimumab                             | 44  | 0 |
|    |                   |       |                                                     |                | ipilimumab+<br>interferon- $\alpha$ 2b | 39  | 0 |
| 20 | Melissa,<br>2019  | I     | melanoma                                            | metastatic     | pembrolizumab                          | 40  | 0 |
| 21 | Ulrich,<br>2019   | I     | melanoma                                            | metastatic     | avelumab                               | 51  | 0 |
| 22 | Hellmann,<br>2018 | III   | lung cancer                                         | metastatic     | nivolumab                              | 391 | 2 |
|    |                   |       |                                                     |                | nivolumab+<br>ipilimumab               | 576 | 7 |
| 23 | Yelena,<br>2018   | I/ II | esophagogastric cancer                              | metastatic     | nivolumab                              | 59  | 0 |
|    |                   |       |                                                     |                | nivolumab+<br>ipilimumab               | 101 | 1 |
| 24 | Sandra,<br>2018   | II    | sarcoma                                             | metastatic     | nivolumab                              | 42  | 0 |
|    |                   |       |                                                     |                | nivolumab+<br>ipilimumab               | 42  | 6 |
| 25 | Alexand,<br>2018  | III   | melanoma                                            | metastatic     | pembrolizumab                          | 509 | 1 |
| 26 | David,<br>2018    | II    | renal cell carcinoma                                | metastatic     | atezolizumab                           | 103 | 0 |
| 27 | Robert,<br>2018   | III   | head and neck squamous<br>cell carcinoma            | metastatic     | nivolumab                              | 236 | 2 |
| 28 | Antonio,<br>2018  | I     | glioblastoma                                        | non-metastatic | nivolumab                              | 10  | 0 |
|    |                   |       |                                                     |                | nivolumab+<br>ipilimumab               | 30  | 2 |
| 29 | Matteo,<br>2018   | III   | melanoma                                            | metastatic     | pembrolizumab                          | 368 | 1 |
|    |                   |       |                                                     |                | ipilimumab                             | 168 | 0 |
| 30 | Migden,<br>2018   | II    | cutaneous squamous-<br>cell carcinoma               | metastatic     | cemiplimab                             | 59  | 3 |
| 31 | Charles,<br>2018  | II    | gastric/gastroesophageal<br>junction adenocarcinoma | metastatic     | pembrolizumab                          | 259 | 0 |
| 32 | Brigitte,<br>2018 | II    | nasopharyngeal carcinoma                            | metastatic     | nivolumab                              | 45  | 1 |
| 33 | Ranee,<br>2018    | I     | head and neck squamous<br>cell carcinoma            | metastatic     | pembrolizumab                          | 192 | 0 |
| 34 | Richard,<br>2018  | II    | melanoma                                            | metastatic     | ipilimumab                             | 6   | 0 |
| 35 | James,<br>2018    | III   | melanoma                                            | metastatic     | nivolumab                              | 268 | 0 |
| 36 | Daniel,<br>2018   | I     | urothelial cancer                                   | metastatic     | atezolizumab                           | 95  | 0 |
| 37 | Toyoaki,<br>2018  | III   | lung cancer                                         | metastatic     | atezolizumab                           | 56  | 0 |

|    |                   |       |                                          |                |                          |     |   |
|----|-------------------|-------|------------------------------------------|----------------|--------------------------|-----|---|
| 38 | David,<br>2018    | II    | lung cancer                              | metastatic     | atezolizumab             | 137 | 1 |
| 39 | Makoto,<br>2018   | I     | head and neck squamous<br>cell carcinoma | metastatic     | pembrolizumab            | 26  | 0 |
| 40 | Colevas,<br>2018  | I     | head and neck squamous<br>cell carcinoma | metastatic     | atezolizumab             | 32  | 0 |
| 41 | Dan,<br>2018      | II    | lung cancer                              | metastatic     | durvalumab               | 112 | 0 |
| 42 | Adra,<br>2018     | II    | germ-cell tumors                         | metastatic     | pembrolizumab            | 12  | 0 |
| 43 | Hope,<br>2018     | I     | breast cancer                            | metastatic     | pembrolizumab            | 25  | 0 |
| 44 | Jong,<br>2018     | II    | lung cancer                              | metastatic     | nivolumab                | 100 | 1 |
| 45 | Weber,<br>2017    | III   | melanoma                                 | metastatic     | nivolumab                | 452 | 0 |
|    |                   |       |                                          |                | ipilimumab               | 453 | 2 |
| 46 | Arjun,<br>2017    | II    | urothelial carcinoma                     | metastatic     | atezolizumab             | 119 | 1 |
| 47 | Achim,<br>2017    | III   | lung cancer                              | metastatic     | atezolizumab             | 609 | 0 |
| 48 | Antonia,<br>2017  | III   | lung cancer                              | non-metastatic | durvalumab               | 475 | 7 |
| 49 | Thomas,<br>2017   | I/ II | urothelial carcinoma                     | metastatic     | durvalumab               | 191 | 2 |
| 50 | Van,<br>2017      | II    | anal canal carcinoma                     | metastatic     | nivolumab                | 37  | 0 |
| 51 | Michael,<br>2017  | II    | colorectal cancer                        | metastatic     | nivolumab                | 74  | 0 |
| 52 | Wolchok,<br>2017  | III   | melanoma                                 | metastatic     | nivolumab                | 313 | 1 |
|    |                   |       |                                          |                | ipilimumab               | 311 | 1 |
|    |                   |       |                                          |                | nivolumab+<br>ipilimumab | 313 | 2 |
| 53 | Bellmunt,<br>2017 | III   | urothelial carcinoma                     | metastatic     | pembrolizumab            | 266 | 4 |
| 54 | Jason,<br>2017    | II    | melanoma                                 | metastatic     | ipilimumab               | 95  | 0 |
| 55 | Necchi,<br>2017   | II    | urothelial carcinoma                     | metastatic     | atezolizumab             | 137 | 0 |
| 56 | Solange,<br>2017  | II    | lung cancer                              | metastatic     | atezolizumab             | 659 | 1 |
| 57 | Wei,<br>2017      | II    | lymphocytic leukemia                     | non-metastatic | pembrolizumab            | 25  | 0 |

|    |                    |     |                                                     |                |                          |     |   |
|----|--------------------|-----|-----------------------------------------------------|----------------|--------------------------|-----|---|
| 58 | Bert,<br>2017      | I   | colorectal carcinoma                                | metastatic     | pembrolizumab            | 23  | 0 |
| 59 | Hui,<br>2017       | I   | lung cancer                                         | metastatic     | pembrolizumab            | 101 | 0 |
| 60 | Toyoaki,<br>2017   | II  | lung cancer                                         | metastatic     | nivolumab                | 35  | 1 |
| 61 | Ott,<br>2017       | I   | anal carcinoma                                      | metastatic     | pembrolizumab            | 25  | 0 |
| 62 | Joshua,<br>2017    | II  | head and neck squamous<br>cell carcinoma            | metastatic     | pembrolizumab            | 171 | 1 |
| 63 | Pier,<br>2017      | I   | B-cell lymphoma                                     | non-metastatic | pembrolizumab            | 18  | 0 |
| 64 | Yoshihiko,<br>2017 | III | renal cell carcinoma                                | non-metastatic | nivolumab                | 37  | 0 |
| 65 | Eytan,<br>2017     | II  | uterine leiomyosarcoma                              | metastatic     | nivolumab                | 12  | 0 |
| 66 | Noboru,<br>2017    | I   | lung cancer                                         | metastatic     | nivolumab                | 17  | 0 |
| 67 | Yung,<br>2017      | II  | gastric/gastroesophageal<br>junction adenocarcinoma | metastatic     | ipilimumab               | 57  | 0 |
| 68 | Naoya,<br>2017     | I   | melanoma                                            | metastatic     | pembrolizumab            | 42  | 2 |
| 69 | Keun,<br>2017      | I   | lung cancer                                         | metastatic     | nivolumab                | 18  | 0 |
| 70 | Naoya,<br>2017     | II  | melanoma                                            | metastatic     | nivolumab                | 23  | 0 |
| 71 | Tara,<br>2017      | II  | melanoma                                            | metastatic     | pembrolizumab            | 947 | 0 |
| 72 | Dai,<br>2017       | II  | hodgkin lymphoma                                    | non-metastatic | nivolumab                | 17  | 0 |
| 73 | Martin,<br>2016    | III | lung cancer                                         | metastatic     | pembrolizumab            | 154 | 1 |
| 74 | Ferris,<br>2016    | III | head and neck squamous<br>cell carcinoma            | non-metastatic | nivolumab                | 236 | 2 |
| 75 | Stephen,<br>2016   | II  | melanoma                                            | metastatic     | ipilimumab               | 46  | 0 |
|    |                    |     |                                                     |                | nivolumab+<br>ipilimumab | 94  | 3 |
| 76 | Rita,<br>2016      | I   | triple-negative breast<br>cancer                    | metastatic     | pembrolizumab            | 32  | 1 |
| 77 | Jonathan,<br>2016  | II  | urothelial carcinoma                                | metastatic     | atezolizumab             | 310 | 0 |
| 78 | Eggermont<br>2016  | II  | melanoma                                            | metastatic     | ipilimumab               | 471 | 5 |

|    |                    |       |                       |                |                          |     |   |
|----|--------------------|-------|-----------------------|----------------|--------------------------|-----|---|
| 79 | Christophe<br>2016 | I/ II | bladder cancer        | metastatic     | durvalumab               | 61  | 0 |
| 80 | Alexander<br>2016  | I     | hodgkin lymphoma      | non-metastatic | nivolumab                | 81  | 1 |
| 81 | Scott,<br>2016     | I     | lung cancer           | metastatic     | nivolumab                | 52  | 0 |
| 82 | Anas,<br>2016      | II    | hodgkin lymphoma      | non-metastatic | nivolumab                | 80  | 1 |
| 83 | Paul,<br>2016      | II    | merkel-cell carcinoma | metastatic     | pembrolizumab            | 26  | 0 |
| 84 | Melinda,<br>2016   | I     | melanoma              | metastatic     | ipilimumab               | 33  | 0 |
| 85 | Padmanee,<br>2016  | I/ II | urothelial carcinoma  | metastatic     | nivolumab                | 78  | 1 |
| 86 | Philippe,<br>2016  | I     | hodgkin lymphoma      | non-metastatic | pembrolizumab            | 31  | 0 |
| 87 | Toshio,<br>2016    | I     | lung cancer           | metastatic     | pembrolizumab            | 10  | 0 |
| 88 | James,<br>2015     | III   | melanoma              | metastatic     | nivolumab                | 313 | 1 |
|    |                    |       |                       |                | ipilimumab               | 311 | 1 |
|    |                    |       |                       |                | nivolumab+<br>ipilimumab | 313 | 0 |
| 89 | Le,<br>2015        | II    | colorectal carcinomas | metastatic     | pembrolizumab            | 41  | 0 |
| 90 | Hossein,<br>2015   | III   | lung cancer           | metastatic     | nivolumab                | 287 | 1 |
| 91 | Robert,<br>2015    | III   | renal cell carcinoma  | metastatic     | nivolumab                | 406 | 0 |
| 92 | Julie,<br>2015     | III   | lung cancer           | metastatic     | nivolumab                | 131 | 0 |
| 93 | Caroline,<br>2015  | III   | melanoma              | metastatic     | nivolumab                | 206 | 0 |
| 94 | Edward,<br>2015    | I     | lung cancer           | metastatic     | pembrolizumab            | 495 | 1 |
| 95 | Caroline,<br>2015  | III   | melanoma              | metastatic     | pembrolizumab            | 550 | 0 |
|    |                    |       |                       |                | ipilimumab               | 256 | 1 |
| 96 | Stephen,<br>2015   | I     | hodgkin lymphoma      | non-metastatic | nivolumab                | 23  | 0 |
| 97 | Michael,<br>2015   | I     | melanoma              | metastatic     | ipilimumab               | 46  | 0 |
|    |                    |       |                       |                | nivolumab+<br>ipilimumab | 94  | 0 |
| 98 | Naiyer,<br>2015    | II    | lung cancer           | metastatic     | nivolumab                | 117 | 2 |

|     |                 |       |                                                  |                |                           |     |   |
|-----|-----------------|-------|--------------------------------------------------|----------------|---------------------------|-----|---|
| 99  | Robert, 2015    | II    | renal cell carcinoma                             | metastatic     | nivolumab                 | 167 | 0 |
| 100 | Scott, 2015     | I     | lung cancer                                      | metastatic     | nivolumab                 | 129 | 3 |
| 101 | David, 2015     | I     | renal cell carcinoma                             | metastatic     | nivolumab                 | 34  | 0 |
| 102 | Lisa, 2015      | II    | melanoma                                         | metastatic     | ipilimumab                | 103 | 0 |
| 103 | Disa, 2015      | II    | melanoma                                         | metastatic     | ipilimumab                | 53  | 1 |
| 104 | Yamazaki, 2015  | II    | melanoma                                         | metastatic     | ipilimumab                | 20  | 0 |
| 105 | Yoshihiko, 2020 | III   | renal cell carcinoma                             | non-metastatic | nivolumab+ ipilimumab     | 38  | 1 |
| 106 | Celeste, 2019   | III   | melanoma                                         | metastatic     | nivolumab+ ipilimumab     | 358 | 1 |
| 107 | Michael, 2019   | II    | melanoma                                         | metastatic     | nivolumab+ ipilimumab     | 124 | 0 |
| 108 | Motzer, 2018    | III   | renal cell carcinoma                             | metastatic     | nivolumab+ ipilimumab     | 547 | 8 |
| 109 | Hussein, 2018   | II    | melanoma                                         | metastatic     | nivolumab+ ipilimumab     | 94  | 1 |
| 110 | Kenjiro, 2018   | II    | melanoma                                         | metastatic     | nivolumab+ ipilimumab     | 30  | 0 |
| 111 | Michael, 2018   | I     | melanoma                                         | metastatic     | ipilimumab+ pembrolizumab | 22  | 0 |
| 112 | Margaret, 2018  | I     | melanoma                                         | metastatic     | nivolumab+ ipilimumab     | 94  | 1 |
| 113 | Matthew, 2017   | I     | lung cancer                                      | metastatic     | nivolumab+ ipilimumab     | 77  | 0 |
| 114 | Scott, 2016     | I     | lung cancer                                      | metastatic     | durvalumab+ tremelimumab  | 103 | 3 |
| 115 | Jeffrey, 2016   | II    | melanoma                                         | metastatic     | nivolumab+ ipilimumab     | 138 | 0 |
| 116 | Alex, 2020      | I/ II | B-cell lymphoma                                  | non-metastatic | durvalumab+ ibrutinib     | 61  | 0 |
| 117 | Erminia, 2019   | II    | oropharyngeal cancer                             | non-metastatic | nivolumab+ vaccine        | 24  | 0 |
| 118 | Boku, 2019      | II    | gastric/gastroesophageal junction adenocarcinoma | metastatic     | nivolumab+ chemotherapy   | 21  | 0 |
|     |                 |       |                                                  |                | nivolumab+ chemotherapy   | 18  | 0 |

|     |                |       |                               |                |                              |     |    |
|-----|----------------|-------|-------------------------------|----------------|------------------------------|-----|----|
| 119 | Sylvia, 2019   | I     | triple-negative breast cancer | metastatic     | Atezolizumab+nab-Paclitaxel  | 33  | 0  |
| 120 | James, 2019    | I/ II | lung cancer                   | metastatic     | pembrolizumab + erlotinib    | 12  | 0  |
|     |                |       |                               |                | pembrolizumab + gefitinib    | 7   | 0  |
| 121 | Hiroji, 2019   | III   | triple-negative breast cancer | metastatic     | Atezolizumab+nab-Paclitaxel  | 34  | 0  |
| 122 | Socinski, 2018 | III   | lung cancer                   | metastatic     | atezolizumab+ bevacizumab    | 393 | 11 |
| 123 | David, 2018    | II    | renal cell carcinoma          | metastatic     | atezolizumab+ bevacizumab    | 101 | 1  |
| 124 | Paz-Ares, 2018 | III   | lung cancer                   | metastatic     | pembrolizumab + chemotherapy | 278 | 10 |
| 125 | Gandhi, 2018   | III   | lung cancer                   | metastatic     | pembrolizumab + chemotherapy | 405 | 27 |
| 126 | Michael, 2018  | I     | melanoma                      | metastatic     | pembrolizumab + PEG-IFN      | 17  | 0  |
| 127 | Asim, 2018     | I     | renal cell carcinoma          | metastatic     | nivolumab+ sunitinib         | 33  | 0  |
|     |                |       |                               |                | nivolumab+ pazopanib         | 20  | 0  |
| 128 | Michael, 2018  | I     | renal cell carcinoma          | metastatic     | pembrolizumab + axitinib     | 52  | 0  |
| 129 | Alex, 2018     | I/ II | hodgkin lymphoma              | non-metastatic | nivolumab+ brentuximab       | 61  | 0  |
| 130 | Scott, 2018    | I     | lung cancer                   | metastatic     | nivolumab+ erlotinib         | 21  | 0  |
| 131 | Richard, 2018  | II    | melanoma                      | metastatic     | ipilimumab+ ATRA             | 4   | 0  |
| 132 | John, 2018     | I     | lung cancer                   | metastatic     | nivolumab+ interleukin       | 21  | 1  |
| 133 | Hendrik, 2018  | I     | biliary tract cancer          | metastatic     | ramucirumab+ pembrolizumab   | 26  | 0  |
| 134 | Mamta, 2018    | I     | urothelial cancer             | metastatic     | pembrolizumab + docetaxel    | 12  | 0  |
| 135 | Jason, 2017    | II    | lung cancer                   | metastatic     | ipilimumab+ talimogene       | 95  | 0  |
| 136 | Anthony, 2017  | I     | lung cancer                   | metastatic     | pembrolizumab + utomilumab   | 23  | 0  |
| 137 | Chad, 2017     | I     | lung cancer                   | metastatic     | ipilimumab+ radiation        | 35  | 0  |

|     |                   |    |                                   |            |                                 |    |   |
|-----|-------------------|----|-----------------------------------|------------|---------------------------------|----|---|
| 138 | Sandra,<br>2017   | I  | gastrointestinal stromal<br>tumor | metastatic | ipilimumab+<br>dasatinib        | 24 | 0 |
| 139 | Matthew,<br>2017  | I  | melanoma                          | metastatic | ipilimumab+<br>imatinib         | 35 | 0 |
| 140 | Corey,<br>2016    | II | lung cancer                       | metastatic | pembrolizumab<br>+ chemotherapy | 59 | 1 |
| 141 | Naiyer,<br>2016   | I  | lung cancer                       | metastatic | nivolumab+<br>chemotherapy      | 56 | 0 |
| 142 | Igor,<br>2016     | I  | melanoma                          | metastatic | ipilimumab+ T-<br>VEC           | 19 | 0 |
| 143 | Eburne,<br>2016   | II | lung cancer                       | metastatic | ipilimumab+<br>chemotherapy     | 39 | 5 |
| 144 | Yamazaki,<br>2015 | II | melanoma                          | metastatic | ipilimumab+<br>dacarbazine      | 15 | 0 |
| 145 | Geoffrey,<br>2015 | II | melanoma                          | metastatic | nivolumab+<br>vaccine           | 33 | 0 |

**Additional Table S2.** Percentages of most common TRAEs

|                               | <b>Cohort1</b> | <b>Cohort2</b> | <b>Cohort3</b> | <b>PD-1</b>    | <b>PD-L1</b>  | <b>CTLA-4</b> |
|-------------------------------|----------------|----------------|----------------|----------------|---------------|---------------|
|                               | <b>n=16295</b> | <b>n=3321</b>  | <b>n=2170</b>  | <b>n=10407</b> | <b>n=3350</b> | <b>n=2538</b> |
| <b>Hypothyroidism</b>         | 0.3            | 0.3            | 0.4            | 0.3            | 0.5           | 0.3           |
| <b>Hyperthyroidism</b>        | 0.1            | 0.3            | 0.1            | 0.0            | 0.2           | 0.1           |
| <b>Nausea</b>                 | 0.4            | 1.5            | 2.6            | 0.2            | 0.8           | 0.5           |
| <b>Diarrhea</b>               | 2.1            | 5.4            | 4.9            | 1.0            | 1.2           | 7.8           |
| <b>Colitis</b>                | 1.2            | 4.0            | 1.6            | 0.5            | 0.4           | 5.2           |
| <b>ALT increase</b>           | 1.0            | 4.5            | 3.1            | 0.5            | 1.3           | 2.4           |
| <b>AST increase</b>           | 0.9            | 3.3            | 3.0            | 0.4            | 1.6           | 1.8           |
| <b>Arthralgia</b>             | 0.2            | 0.1            | 0.5            | 0.1            | 0.4           | 0.3           |
| <b>Myalgia</b>                | 0.1            | 0.0            | 0.2            | 0.0            | 0.1           | 0.0           |
| <b>Pruritus</b>               | 0.3            | 0.7            | 0.3            | 0.1            | 0.6           | 0.6           |
| <b>Rash</b>                   | 0.7            | 2.0            | 2.3            | 0.4            | 0.9           | 1.8           |
| <b>Pneumonitis</b>            | 0.8            | 0.5            | 1.5            | 0.7            | 1.3           | 0.3           |
| <b>Fatigue</b>                | 1.0            | 2.8            | 4.8            | 0.9            | 1.3           | 0.9           |
| <b>Decreased<br/>appetite</b> | 0.4            | 0.8            | 1.8            | 0.2            | 0.7           | 0.4           |
| <b>Hypophysitis</b>           | 0.3            | 0.6            | 0.5            | 0.1            | 0.1           | 1.4           |

Cohort 1: ICI monotherapy; Cohort 2: combined therapy of two ICIs; Cohort 3: ICI plus other treatments.
